# Supplementary material for: Argentophilic hydrogels: elucidating the structure of neutral versus acidic systems
Source: Royal Society of Chemistry journal article supplement (doi:10.1039/c0sm01217c), 2011-01-01
Supplement: c0sm01217c.pdf [file c0sm01217c.pdf]

Electronic Supplementary Information for:

## Argentophilic hydrogels: elucidating the structure of neutral versus acidic systems

Pablo Casuso, Pedro Carrasco, Iraida Loinaz, Germán Cabañero, Hans J. Grande and

Ibon Odriozola\*

*CIDETEC Centre for Electrochemical Technologies, New Materials Department, Paseo  
Miramón 196, 20009 Donostia-San Sebastián, Spain*

\* To whom correspondence should be addressed. E-mail: iodriozola@cidetec.es

### Supplementary Schemes and Figures

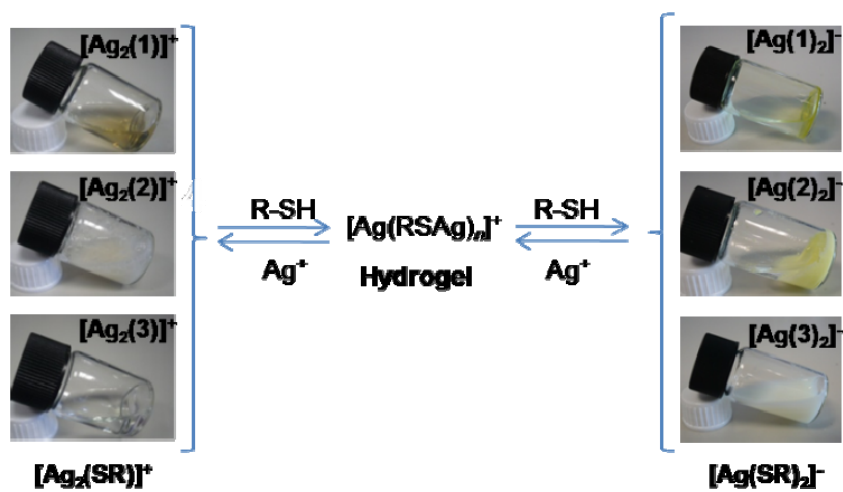

**Scheme S1** Reversible collapse of the hydrogels **Ag(1–3)** upon the addition of a 2-fold excess silver (left) and a 2-fold excess of thiol (right).

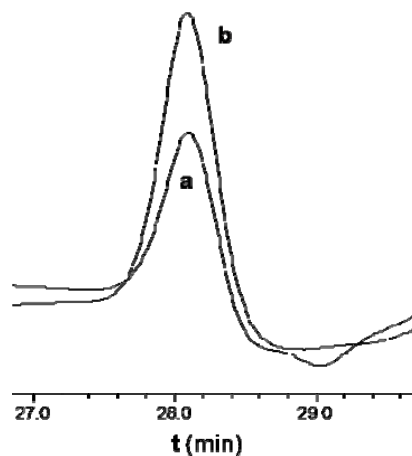

**Fig.S1** SEC traces of  $[\text{Ag}_2(1)]^+$  (a) and  $[\text{Ag}_2(3)]^+$  (b).

## TEM analysis

TEM specimens were prepared by adding a drop of hydrogel (sol) onto a carbon-coated copper grid. Images were recorded on a JEOL JEM-2100F UHR apparatus operated at 200 kV. Attempts of analyzing acidic hydrogels **Ag(4-5)** did not give satisfactory results, as there was not any distinguishable microstructure observed.

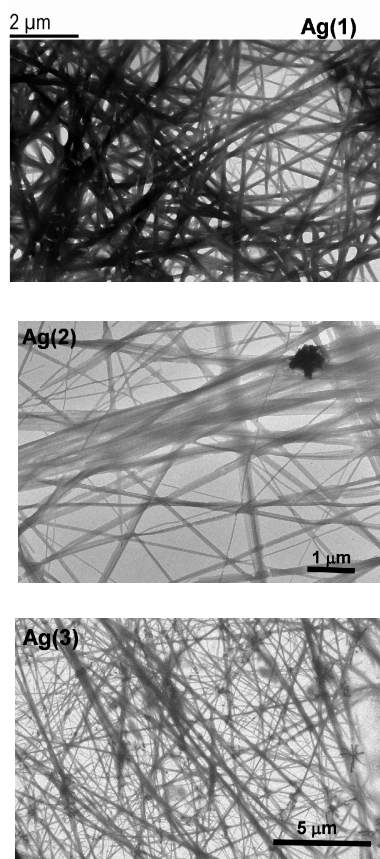

## FT-IR Spectra

Fourier Transformed Infra-Red Spectroscopy (FT-IR) spectra were taken from a Nicolet Avatar 360 apparatus. Hydrogels were freeze-dried and analysed in the solid state. All samples were measured in KBr disks. The spectrum for compound **Ag(1)** was published elsewhere.<sup>1</sup>

### Ag(2)

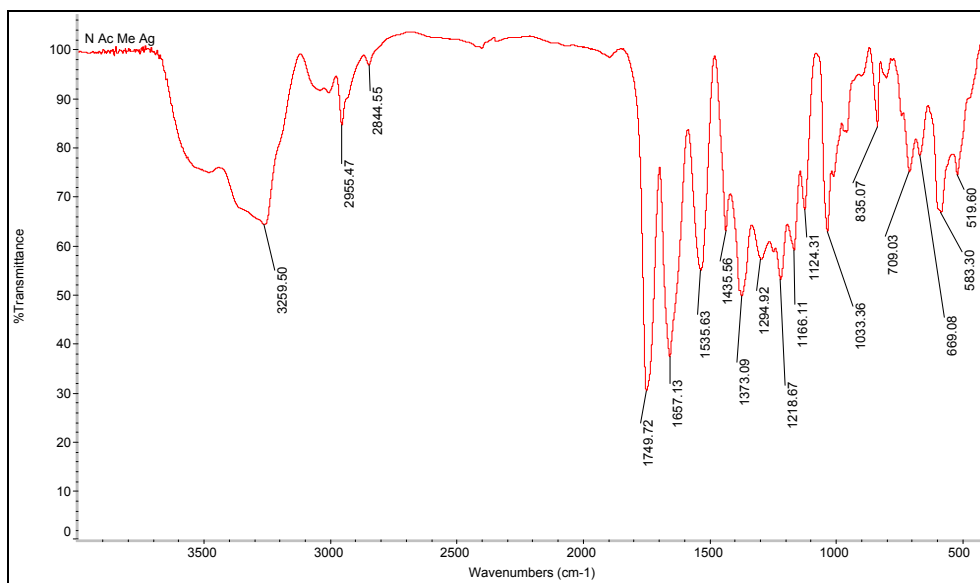

### Ag(3)

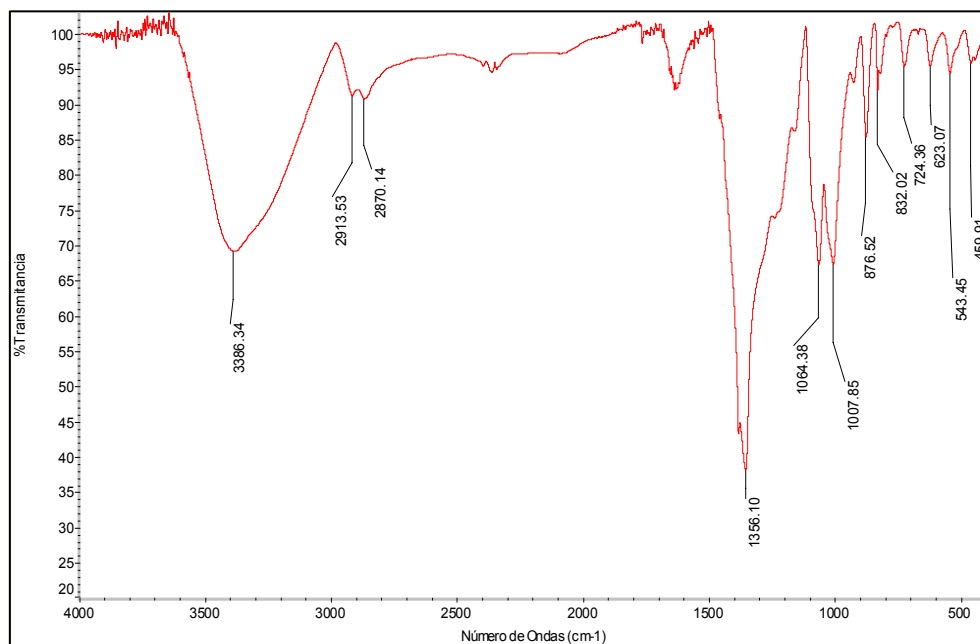

### Ag(4)

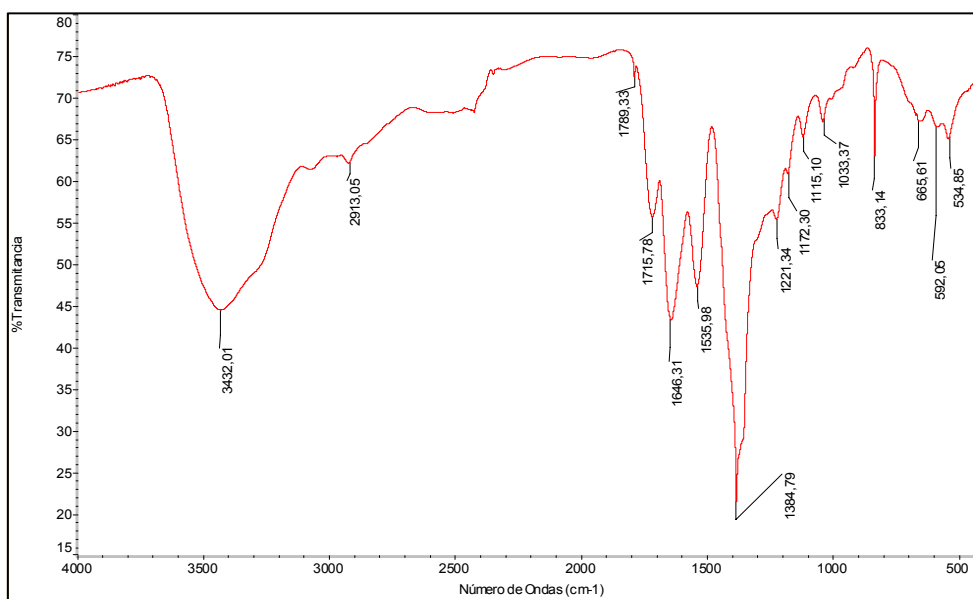

### Ag(5)

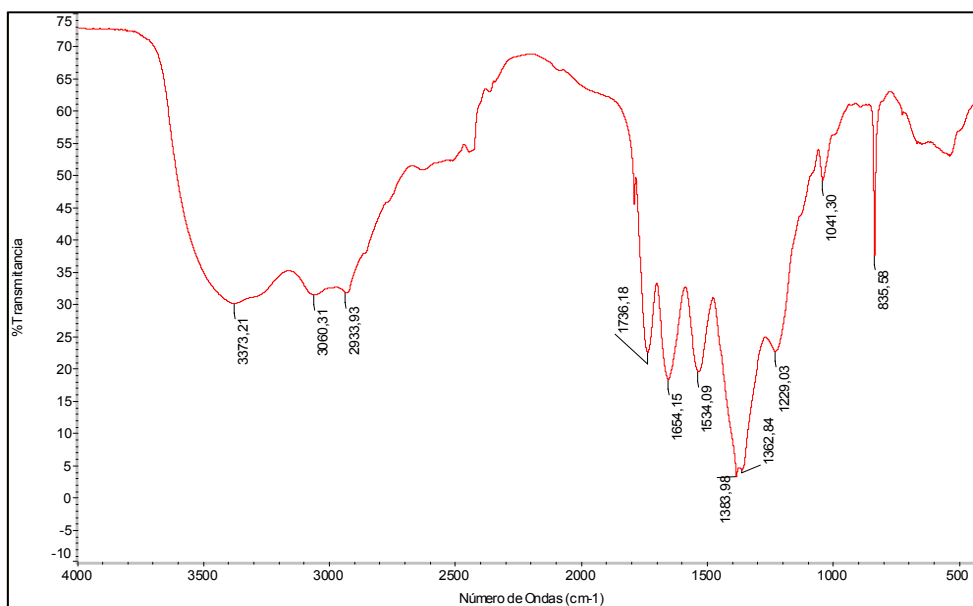

### References

1. P. Casuso, I. Loinaz, M. Moller, P. Carrasco, J. A. Pomposo, H. J. Grande and I. Odriozola, *Supramol. Chem.*, 2009, 21, 581-584.
